# Supplementary material
Source: Springer Nature journal article supplement (https://www.springermedizin.de/resource/supplementary/13012_2011_441_MOESM6_ESM.pdf/9630126)

You are doing a great job getting to both of your goals. Keep it up! Take a look at the graphs to see how you are doing on your goals as compared to other people like you in the study.

### Activity

Last Week's Daily Steps

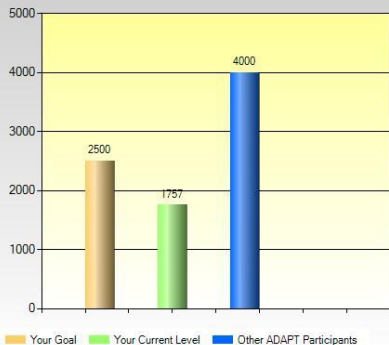

Track your weekly progress

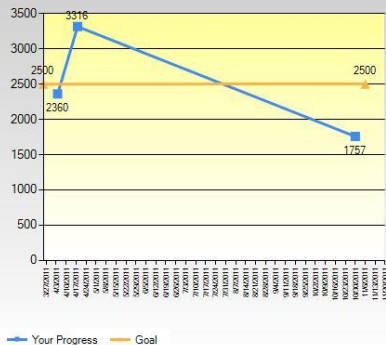

### Diet

Meals where you have used a 9" plate per week.

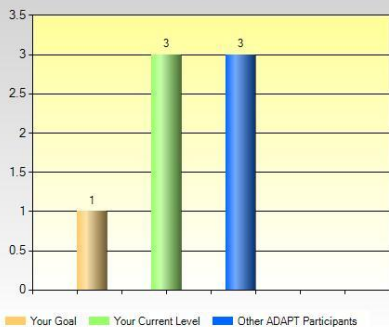

Track your weekly progress

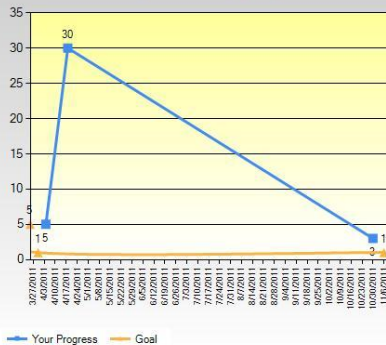

Supplement: MOESM6 [file 9630126]
